# Supplementary material for: The impact of professional midwives and mentoring on the quality and availability of maternity care in government sub-district hospitals in Bangladesh: a mixed-methods observational study
Source: BMC Pregnancy Childbirth. 2022 Nov 8;22:827. doi: 10.1186/s12884-022-05096-x (PMC9644636; doi:10.1186/s12884-022-05096-x)
Supplement: Supplementary file 1 — Additional file 1:Table S1. Quotations and codes contributing to the theme “resistance to change”. [file 12884_2022_5096_MOESM1_ESM.zip]

Archive with 11 entries (11 files):
- 12884_2022_5096_MOESM1_ESM.zip/COREQ Checklist_ESM.pdf
- 12884_2022_5096_MOESM1_ESM.zip/FGD Guideline_ Maternity Staff_ESM.docx
- 12884_2022_5096_MOESM1_ESM.zip/FGD Guideline_ Midwives_ESM.docx
- 12884_2022_5096_MOESM1_ESM.zip/Fixed effect regression_without covariates_ESM.docx
- 12884_2022_5096_MOESM1_ESM.zip/IDI_Guideline_ESM.docx
- 12884_2022_5096_MOESM1_ESM.zip/Mixed effect regression_ESM.docx
- 12884_2022_5096_MOESM1_ESM.zip/Quant Form 1_Facility Observation Tool_ESM.docx
- 12884_2022_5096_MOESM1_ESM.zip/Quant Form 2_Clinical Observation Tool_ESM.docx
- 12884_2022_5096_MOESM1_ESM.zip/Quant Form 3_ Survey Tool_ESM.docx
- 12884_2022_5096_MOESM1_ESM.zip/STROBE checklist_ESM.pdf
- 12884_2022_5096_MOESM1_ESM.zip/Table S1_Sample coding process.docx
